# Supplementary material for: The Upregulated Expression of the Citrus RIN4 Gene in HLB Diseased Citrus Aids Candidatus Liberibacter Asiaticus Infection
Source: MDPI journal article supplement (doi:10.3390/ijms23136971), 2022-06-23
Supplement: s1 [file s1]

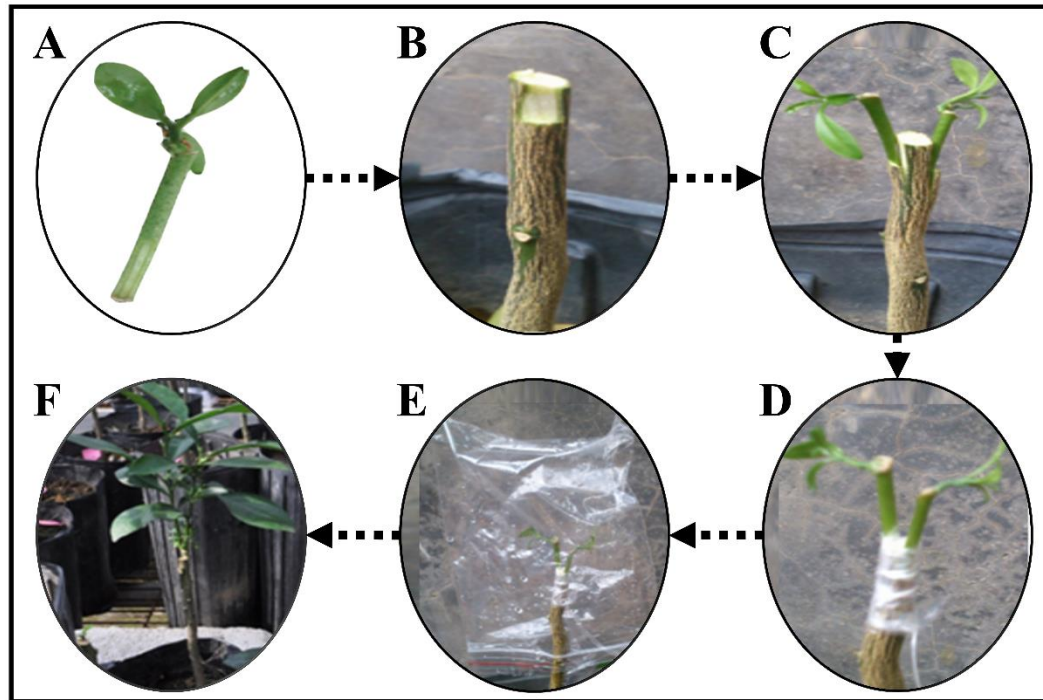

**Figure S1.** Grafting of the regenerated resistant buds. A: The regenerated resistant buds; B: Rootstock used for grafting; C: One or two buds were inserted into the rootstock; D: Binding; E: Bagging to maintain humidity; F: Graft-propagated transgenic plants.
